# Supplementary material
Source: PubMed Central journal article supplement (PMC2993334)
Supplement: 107.46.19627_pnas.201011163SI.pdf [file 107.46.19627_pnas.201011163SI.pdf]

# Supporting Information

DeFries and Rosenzweig 10.1073/pnas.1011163107

Table S1. Countries used to calculate greenhouse gas emissions in Table 1

| ISO             | Country name                     |
|-----------------|----------------------------------|
| Tropical Africa |                                  |
| AGO             | Angola                           |
| BEN             | Benin                            |
| BWA             | Botswana                         |
| BFA             | Burkina Faso                     |
| BDI             | Burundi                          |
| CMR             | Cameroon                         |
| CAF             | Central African Republic         |
| TCD             | Chad                             |
| CIV             | Cote d'Ivoire                    |
| DJI             | Djibouti                         |
| GNQ             | Equatorial Guinea                |
| ERI             | Eritrea                          |
| ETH             | Ethiopia                         |
| GAB             | Gabon                            |
| GMB             | Gambia                           |
| GHA             | Ghana                            |
| GIN             | Guinea                           |
| GNB             | Guinea-Bissau                    |
| KEN             | Kenya                            |
| LBR             | Liberia                          |
| MDG             | Madagascar                       |
| MWI             | Malawi                           |
| MLI             | Mali                             |
| MRT             | Mauritania                       |
| NER             | Niger                            |
| NGA             | Nigeria                          |
| OMN             | Oman                             |
| COG             | Republic of Congo                |
| MOZ             | Mozambique                       |
| NAM             | Namibia                          |
| RWA             | Rwanda                           |
| SDN             | Sudan                            |
| TZA             | Tanzania                         |
| COD             | Democratic Republic of the Congo |
| TGO             | Togo                             |
| UGA             | Uganda                           |
| ARE             | United Arab Emirates             |
| ESH             | Western Sahara                   |
| YEM             | Yemen                            |
| ZMB             | Zambia                           |
| ZWE             | Zimbabwe                         |
| SAU             | Saudi Arabia                     |
| SEN             | Senegal                          |
| SYC             | Seychelles                       |
| SLE             | Sierra Leone                     |
| SOM             | Somalia                          |
| Tropical Asia   |                                  |
| BGD             | Bangladesh                       |
| BRN             | Brunei                           |
| KHM             | Cambodia                         |
| IND             | India                            |
| IDN             | Indonesia                        |
| LAO             | Laos                             |
| MYS             | Malaysia                         |
| PNG             | Papua New Guinea                 |

**Table S1. Cont.**

| ISO                    | Country name  |
|------------------------|---------------|
| PHL                    | Philippines   |
| MMR                    | Myanmar       |
| LKA                    | Sri Lanka     |
| THA                    | Thailand      |
| TLS                    | East Timor    |
| VNM                    | Vietnam       |
| SGP                    | Singapore     |
| Tropical Latin America |               |
| BLZ                    | Belize        |
| BOL                    | Bolivia       |
| BRA                    | Brazil        |
| COL                    | Colombia      |
| CRI                    | Costa Rica    |
| CUB                    | Cuba          |
| ECU                    | Ecuador       |
| SLV                    | El Salvador   |
| GTM                    | Guatemala     |
| GUY                    | Guyana        |
| GUF                    | French Guiana |
| HND                    | Honduras      |
| MEX                    | Mexico        |
| NIC                    | Nicaragua     |
| PAN                    | Panama        |
| PRY                    | Paraguay      |
| PER                    | Peru          |
| SUR                    | Suriname      |
| VEN                    | Venezuela     |

Countries are those with the majority of land area between the Tropic of Cancer and the Tropic of Capricorn.

**Table S2. Comparison of maximum land area gained for food production from deforestation (gross forest loss) and estimated carbon emissions for 2000–2005**

|                        | Change in gross forest area<br>2000–2005 from ref. 1, km <sup>2</sup> |                          | Agricultural area in 2000<br>based on ref. 2, km <sup>2</sup> * |              | Estimated deforestation<br>emissions (2000–2005), Pg<br>CO <sub>2</sub> <sup>†</sup> |                   | CO <sub>2</sub> emissions excluding<br>organic sources from<br>ref. 3 (2000–2005), Pg |
|------------------------|-----------------------------------------------------------------------|--------------------------|-----------------------------------------------------------------|--------------|--------------------------------------------------------------------------------------|-------------------|---------------------------------------------------------------------------------------|
|                        | Dry tropical forest                                                   | Humid tropical<br>forest | Crop area                                                       | Pasture area | Dry forest                                                                           | Humid forest      |                                                                                       |
| Tropical Latin America | 53,959                                                                | 159,427                  | 1,187,396                                                       | 3,797,626    | 0.98                                                                                 | 7.52              | 7.44                                                                                  |
| Tropical Africa        | 94,088                                                                | 14,494                   | 1,820,616                                                       | 6,470,506    | 1.00                                                                                 | 0.52              | 3.70                                                                                  |
| Tropical Asia          | 8,766                                                                 | 72,194                   | 2,928,100                                                       | 187,070      | 0.21                                                                                 | 6.43 <sup>‡</sup> | 14.73                                                                                 |
| Total tropics          | 156,813                                                               | 246,115                  | 5,936,113                                                       | 10,455,202   | 2.20                                                                                 | 14.47             | 25.87                                                                                 |

Countries included within each continent are listed in Table S1.

\*The data set used is available at [www.geog.mcgill.ca/landuse/pub/Data/Histlanduse/](http://www.geog.mcgill.ca/landuse/pub/Data/Histlanduse/).

<sup>†</sup>Emissions were estimated from mean biomass values reported in Table 2 in ref. 4 for forest type and continent and a conservative estimate of 0.6 fraction of biomass lost from combustion and decay (5).

<sup>‡</sup>Includes 2.88 Pg CO<sub>2</sub> from peat using annual estimate of 0.12 Pg C/y from ref. 6.

- Hansen MC, Stehman SV, Potapov PV (2010) Quantification of global gross forest cover loss. *Proc Natl Acad Sci USA* 107:8650–8655.
- Ramankutty N, Foley J (1999) Estimating historical changes in global land cover: Croplands from 1700 to 1992. *Global Biogeochem Cycles* 13:997–1027.
- European Commission and Joint Research Center (JRC)/Netherlands Environmental Assessment Agency (PBL) (2009) Emission Database for Global Atmospheric Research (EDGAR), release version 4.9. Available at <http://edgar.jrc.ec.europa.eu>.
- Gibbs H, Brown S, Niles JO, Foley J (2007) Monitoring and estimating tropical forest carbon stocks: Making REDD a reality. *Environ Res Lett* 2:045023.
- van der Werf G, et al. (2010) Global fire emissions and contribution of deforestation, savanna, forest, agricultural, and peat fires (1997–2009). *Atmos Chem Phys* 10:16153–16230.
- van der Werf G, et al. (2009) CO<sub>2</sub> emissions from forest loss. *Nat Geosci* 2:1–2.
